# Supplementary material for: Effect of wet clothing removal on skin temperature in subjects exposed to cold and wrapped in a vapor barrier: a human, randomized, crossover field study
Source: Springer Nature journal article supplement (doi:10.1186/s12873-024-00937-8), 2024-01-25
Supplement: MOESM1 [file 12873_2024_937_MOESM1_ESM.pdf]

[illegible]

|              |  |       |  |
|--------------|--|-------|--|
| Test person: |  | Date: |  |
| Method:      |  | Time: |  |

[illegible]
